# Supplementary material
Source: publisher figshare collection journal article supplement (https://diabetesjournals.figshare.com/ndownloader/files/36250173)
Supplement: Supplementary file 1 [file 36250173]

**A**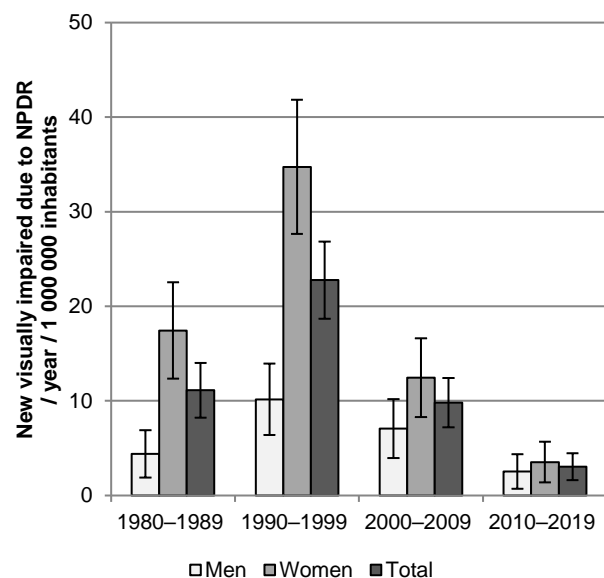**B**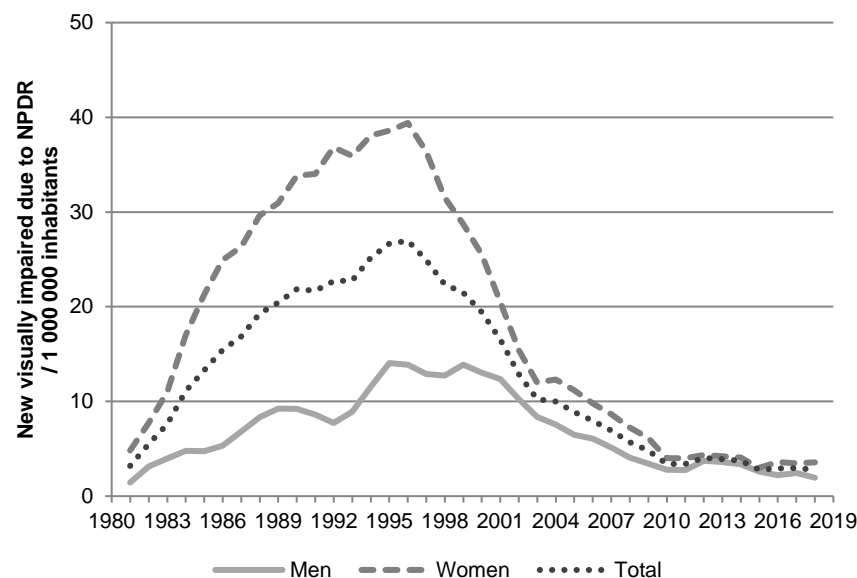**C**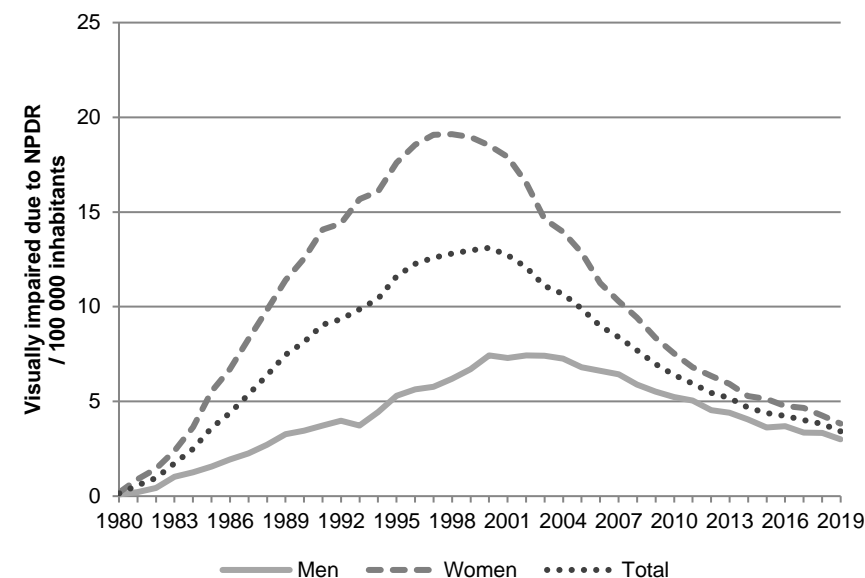**D**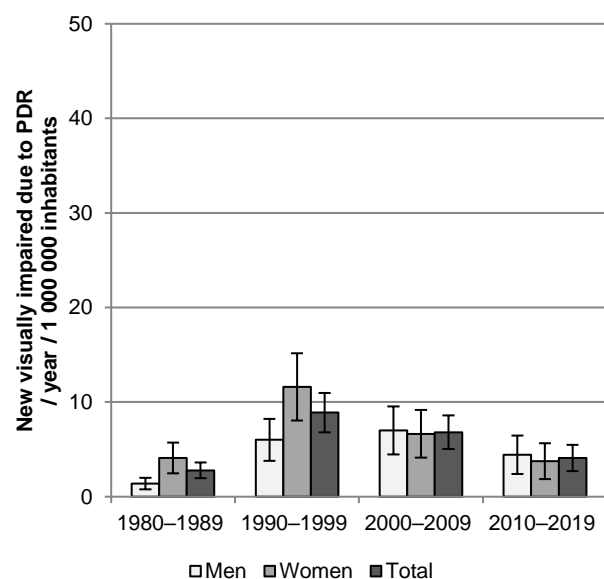**E**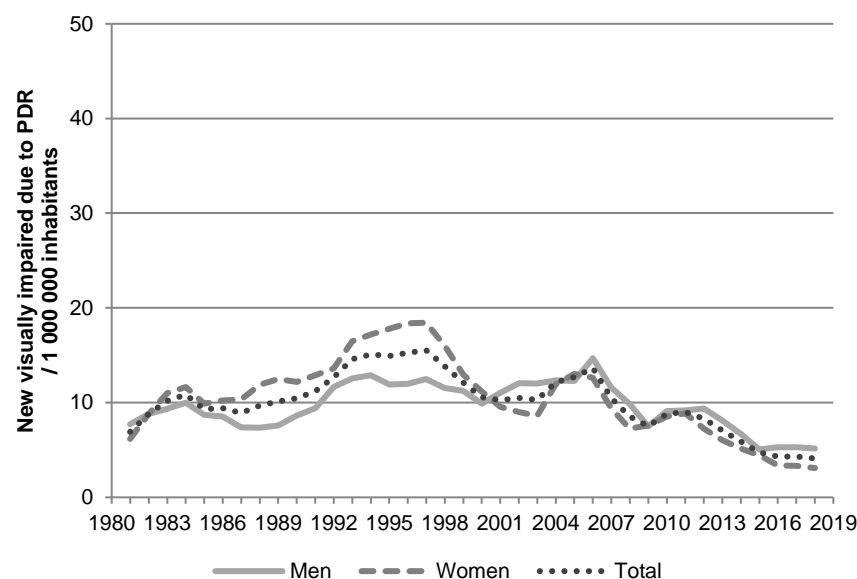**F**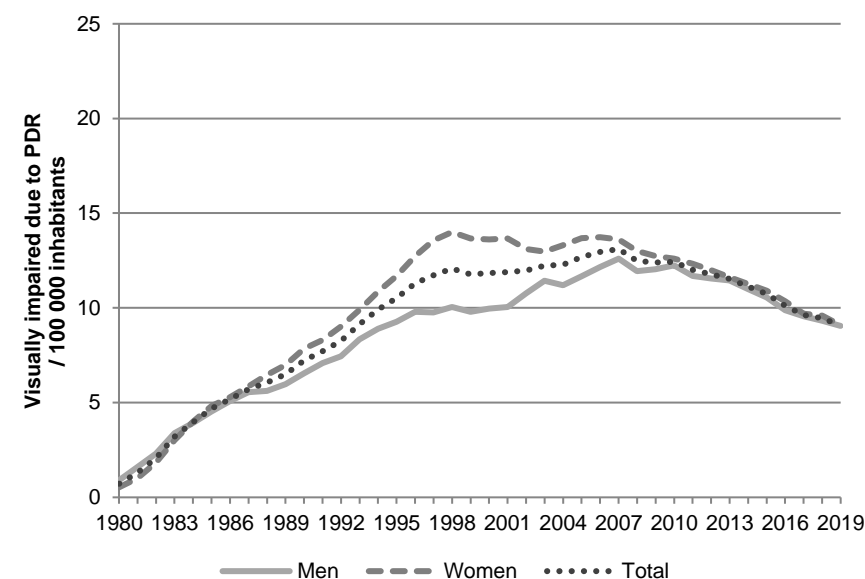

**Supplemental Figure S1—Reported visual impairment due to nonproliferative diabetic retinopathy (NPDR) and proliferative diabetic retinopathy (PDR) in total population during 1980–2019.**

A. Average annual incidence of reported visual impairment due to NPDR per decade adjusted for age and/or sex (with 95% confidence intervals). B. Annual incidence of reported visual impairment due to NPDR smoothed using a three-year central moving average. C. Annual prevalence of reported visual impairment due to NPDR. D. Average annual incidence of reported visual impairment due to PDR per decade adjusted for age and/or sex (with 95% confidence intervals). E. Annual incidence of reported visual impairment due to PDR smoothed using a three-year central moving average. F. Annual prevalence of reported visual impairment due to PDR.

**A**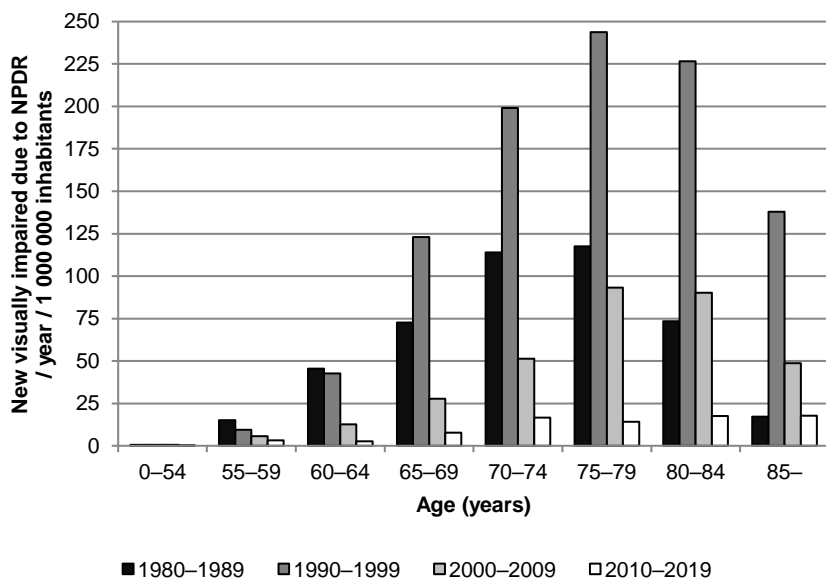**B**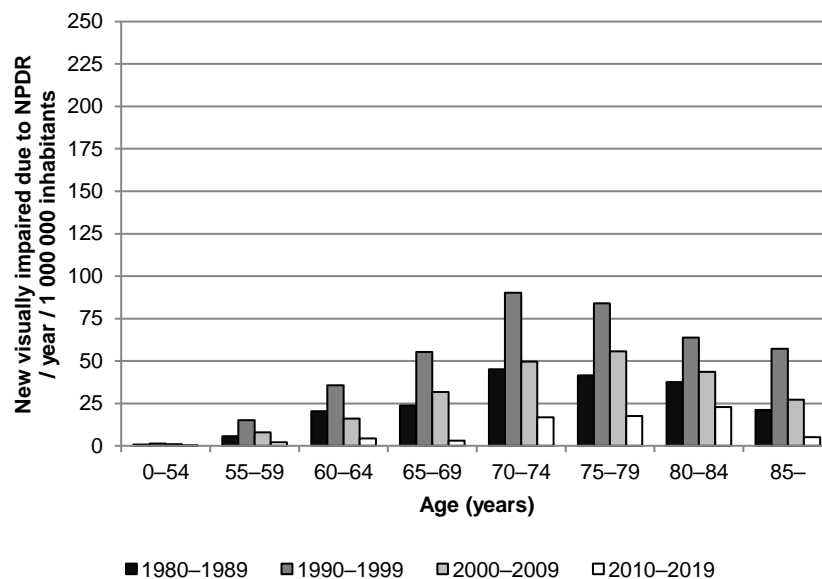**C**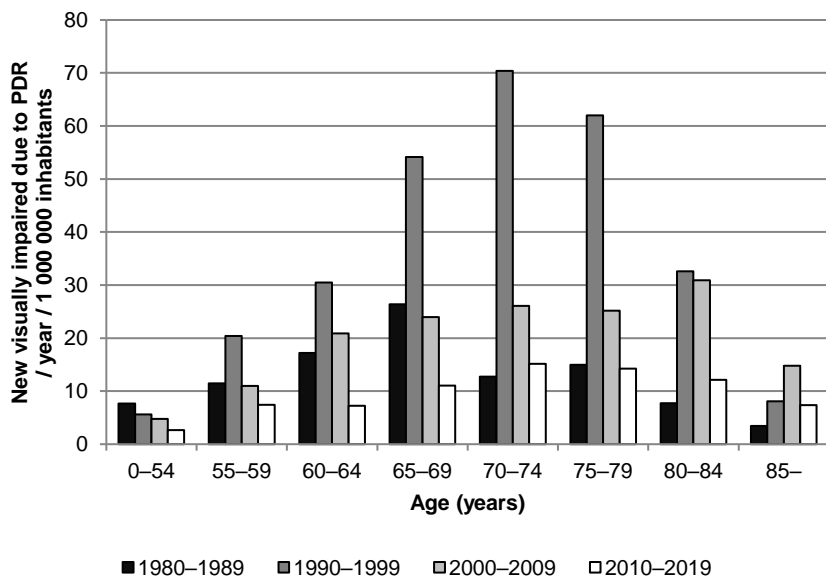**D**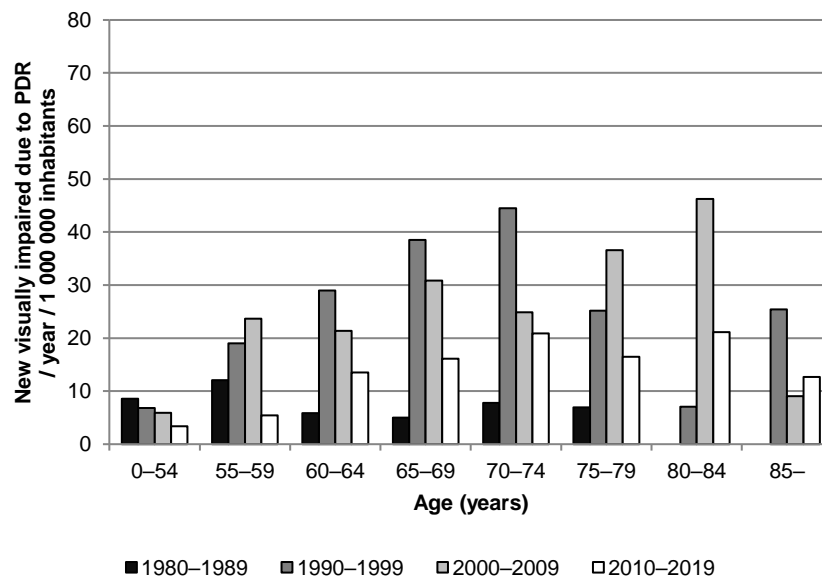

**Supplemental Figure S2—Average annual incidence of reported visual impairment due to nonproliferative diabetic retinopathy (NPDR) and proliferative diabetic retinopathy (PDR) per decade in total population by age. A. NPDR, women. B. NPDR, men. C. PDR, women. D. PDR, men.**

**A**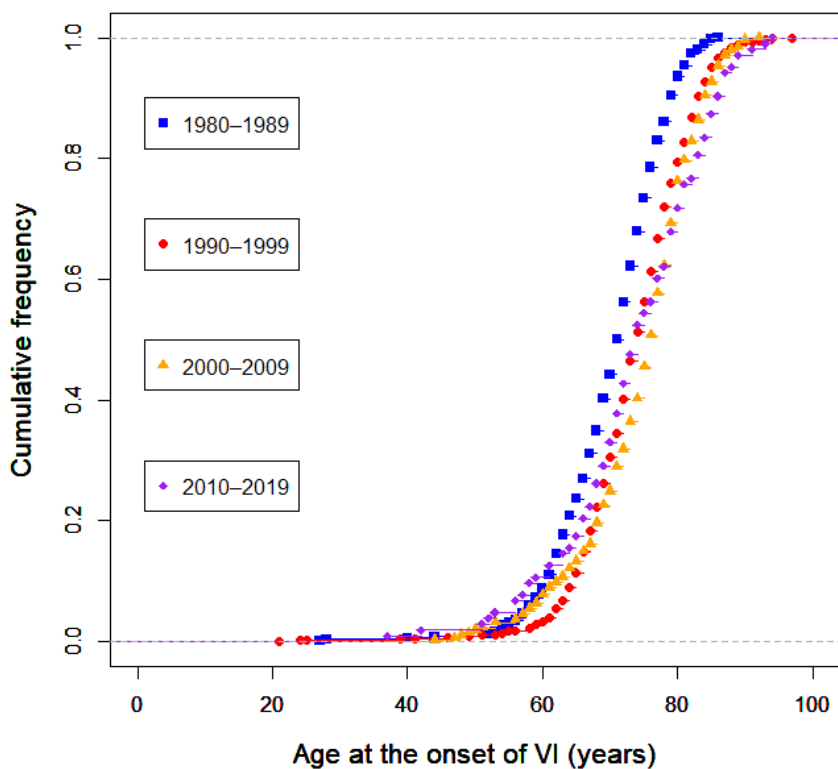**B**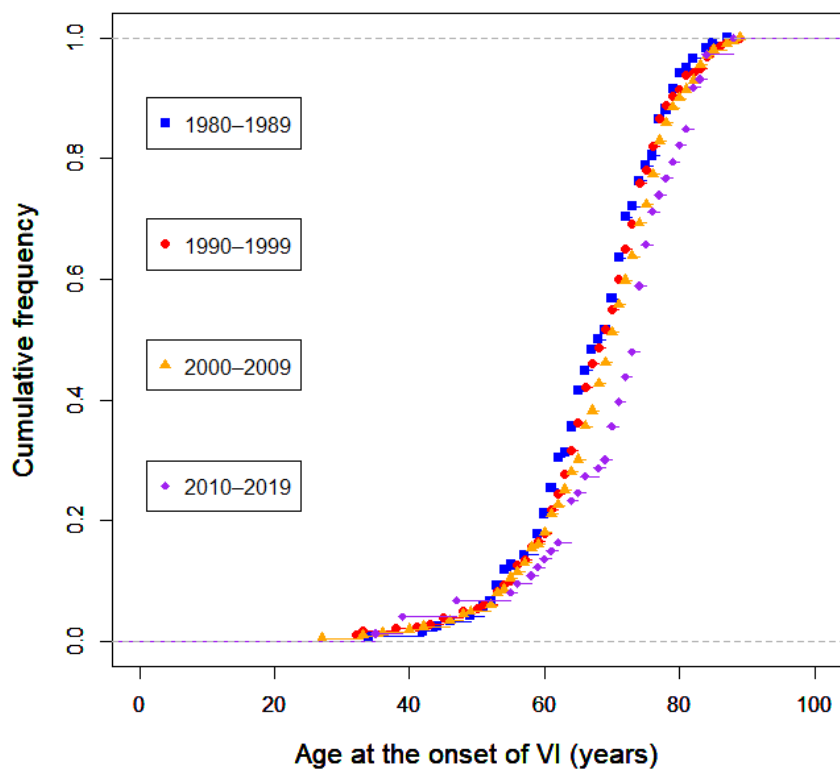**C**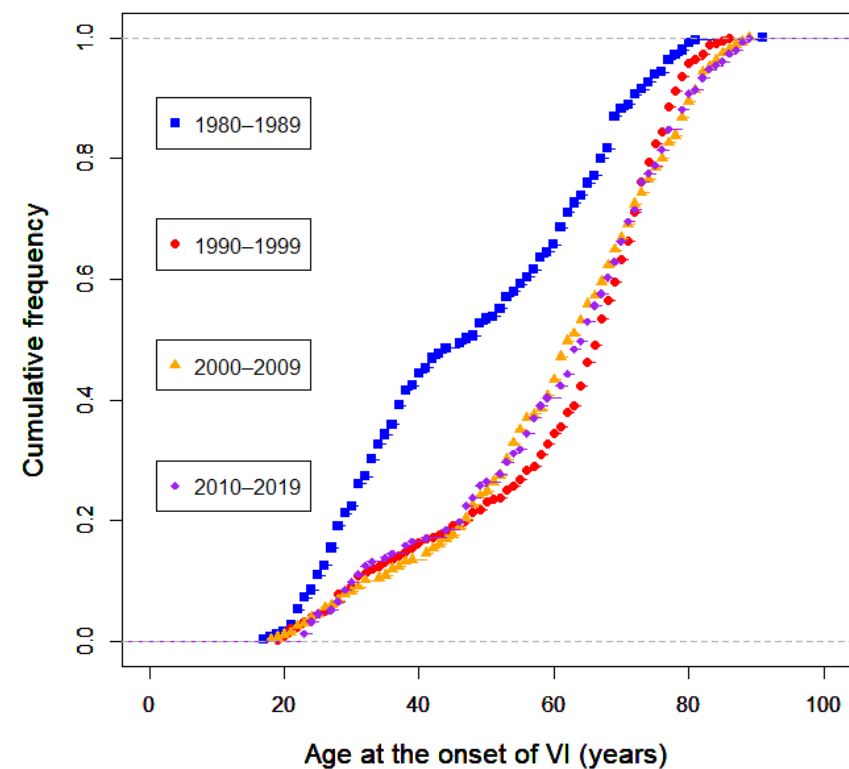**D**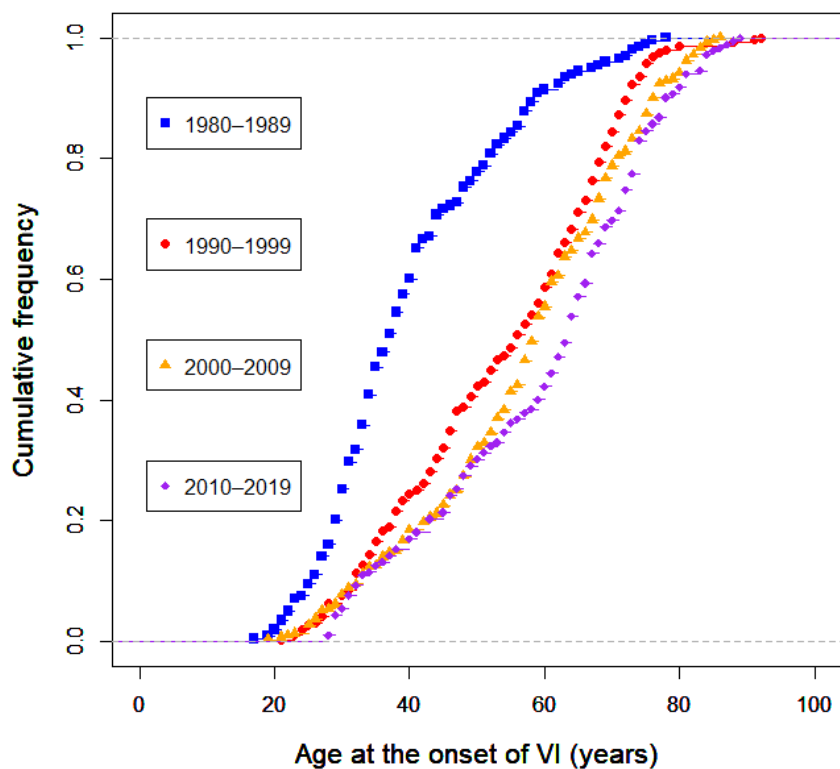

**Supplemental Figure S3—Cumulative frequency of age at the onset of reported visual impairment (VI) due to nonproliferative diabetic retinopathy (NPDR) and proliferative diabetic retinopathy (PDR) by decade of onset. A. NPDR, women. B. NPDR, men. C. PDR, women. D. PDR, men.**

**Supplemental Table S1—Distribution of reported visual impairment due to nonproliferative diabetic retinopathy (NPDR) and proliferative diabetic retinopathy (PDR) by decade of onset**

|                            | 1980–1989 | 1990–1999 | 2000–2009 | 2010–2019 | <i>P</i> (decade difference) |
|----------------------------|-----------|-----------|-----------|-----------|------------------------------|
| NPDR, women                |           |           |           |           |                              |
| Mild visual impairment     | 70.5%     | 74.5%     | 84.3%     | 87.0%     | 0.29                         |
| Moderate visual impairment | 18.3%     | 16.3%     | 11.8%     | 9.0%      | 0.060                        |
| Severe visual impairment   | 10.3%     | 6.3%      | 3.6%      | 4.0%      | 0.004                        |
| Near total blindness       | 0.9%      | 2.7%      | 0.3%      | 0%        | 0.005                        |
| Total blindness            | 0%        | 0.2%      | 0%        | 0%        | 1                            |
| NPDR, men                  |           |           |           |           |                              |
| Mild visual impairment     | 77.1%     | 76.8%     | 85.5%     | 83.8%     | 0.87                         |
| Moderate visual impairment | 12.7%     | 15.2%     | 10.4%     | 14.7%     | 0.59                         |
| Severe visual impairment   | 7.6%      | 6.5%      | 2.6%      | 1.5%      | 0.09                         |
| Near total blindness       | 2.6%      | 1.5%      | 1.5%      | 0%        | 0.71                         |
| Total blindness            | 0%        | 0%        | 0%        | 0%        | 1                            |
| <i>P</i> (sex difference)  | 0.16      | 0.76      | 0.39      | 0.36      |                              |
| PDR, women                 |           |           |           |           |                              |
| Mild visual impairment     | 42.5%     | 64.1%     | 66.0%     | 68.5%     | 0.009                        |
| Moderate visual impairment | 16.3%     | 16.2%     | 19.7%     | 14.0%     | 0.64                         |
| Severe visual impairment   | 11.2%     | 9.4%      | 8.1%      | 7.7%      | 0.68                         |
| Near total blindness       | 16.2%     | 9.6%      | 5.4%      | 8.4%      | 0.004                        |
| Total blindness            | 13.8%     | 0.7%      | 0.8%      | 1.4%      | < 0.001                      |
| PDR, men                   |           |           |           |           |                              |
| Mild visual impairment     | 46.4%     | 62.7%     | 69.5%     | 73.1%     | 0.035                        |
| Moderate visual impairment | 12.9%     | 18.3%     | 14.7%     | 8.2%      | 0.066                        |
| Severe visual impairment   | 10.8%     | 6.4%      | 8.1%      | 11.1%     | 0.29                         |
| Near total blindness       | 20.6%     | 9.7%      | 6.7%      | 5.8%      | < 0.001                      |
| Total blindness            | 9.3%      | 2.9%      | 1.0%      | 1.8%      | < 0.001                      |
| <i>P</i> (sex difference)  | 0.39      | 0.15      | 0.61      | 0.35      |                              |

Statistical significance was calculated using Fisher's exact test.

**Supplemental Table S2—Mean age at the onset of reported visual impairment due to nonproliferative diabetic retinopathy (NPDR) and proliferative diabetic retinopathy (PDR) and age at death by decade of onset**

|                              | 1980–1989           | 1990–1999           | 2000–2009           | 2010–2019           | <i>P</i> (1980s vs. 2010s) |
|------------------------------|---------------------|---------------------|---------------------|---------------------|----------------------------|
| <b>Age at onset VI, NPDR</b> |                     |                     |                     |                     |                            |
| Women, <i>n</i>              | 452                 | 922                 | 345                 | 103                 |                            |
| Women, years<br>(95% CI)     | 70.5<br>(69.8–71.2) | 74.0<br>(73.5–74.5) | 74.8<br>(73.9–75.7) | 73.8<br>(71.8–75.9) | < 0.001                    |
| Men, <i>n</i>                | 118                 | 278                 | 199                 | 73                  |                            |
| Men, years<br>(95% CI)       | 67.4<br>(65.6–69.1) | 67.8<br>(66.6–69.0) | 68.8<br>(67.4–70.3) | 71.0<br>(68.5–73.5) | 0.009                      |
| <i>P</i> (sex difference)    | 0.001               | < 0.001             | < 0.001             | 0.15                |                            |
| <b>Age at onset VI, PDR</b>  |                     |                     |                     |                     |                            |
| Women, <i>n</i>              | 245                 | 410                 | 265                 | 151                 |                            |
| Women, years<br>(95% CI)     | 48.1<br>(45.8–50.4) | 61.3<br>(59.7–62.9) | 60.6<br>(58.5–62.6) | 60.6<br>(57.8–63.4) | < 0.001                    |
| Men, <i>n</i>                | 198                 | 283                 | 292                 | 182                 |                            |
| Men, years<br>(95% CI)       | 40.2<br>(38.4–42.1) | 53.9<br>(52.1–55.8) | 57.0<br>(55.2–58.9) | 59.7<br>(57.4–62.1) | < 0.001                    |
| <i>P</i> (sex difference)    | < 0.001             | < 0.001             | 0.004               | 0.52                |                            |
| <b>Age at death, NPDR</b>    |                     |                     |                     |                     |                            |
| Women, <i>n</i>              | 451                 | 914                 | 309                 | 44                  |                            |
| Women, years<br>(95% CI)     | 76.1<br>(75.4–76.8) | 79.8<br>(79.3–80.3) | 81.6<br>(80.7–82.5) | 81.8<br>(79.4–84.2) | < 0.001                    |
| Men, <i>n</i>                | 118                 | 267                 | 173                 | 34                  |                            |
| Men, years<br>(95% CI)       | 73.3<br>(71.7–75.0) | 74.9<br>(73.8–75.9) | 76.5<br>(75.1–77.8) | 76.6<br>(73.4–79.8) | 0.007                      |
| <i>P</i> (sex difference)    | 0.002               | < 0.001             | < 0.001             | 0.006               |                            |
| <b>Age at death, PDR</b>     |                     |                     |                     |                     |                            |
| Women, <i>n</i>              | 215                 | 357                 | 191                 | 59                  |                            |
| Women, years<br>(95% CI)     | 60.9<br>(58.7–63.0) | 73.2<br>(72.0–74.4) | 73.4<br>(71.4–75.4) | 73.1<br>(69.6–76.5) | < 0.001                    |
| Men, <i>n</i>                | 185                 | 248                 | 208                 | 72                  |                            |
| Men, years<br>(95% CI)       | 52.3<br>(50.4–54.2) | 64.4<br>(62.7–66.2) | 68.6<br>(66.8–70.4) | 70.5<br>(67.4–73.5) | < 0.001                    |
| <i>P</i> (sex difference)    | < 0.001             | < 0.001             | < 0.001             | 0.21                |                            |

Statistical significance was calculated using Mann–Whitney *U* test. CI, confidence interval.
